# Supplementary material
Source: Springer Nature journal article supplement (https://www.springermedizin.de/resource/supplementary/13058_2007_1732_MOESM1_ESM.pdf/9699798)
Supplement: MOESM1 [file 9699798]

**Table 1 supplemental. Sequencing primers**

| <b>Exon</b> | <b>Annealing Temperature, °C (T<sub>ann</sub>)</b> | <b>Forward Primer Sequence</b> | <b>Reverse Primer Sequence</b> | <b>Product Length (with seq tags)</b> |
|-------------|----------------------------------------------------|--------------------------------|--------------------------------|---------------------------------------|
| 1           | 60                                                 | tgcattctctctctctct             | cgcagctgatctcaaggaa            | 622                                   |
| 2           | 57                                                 | tggaccttgagggtattgtt           | ccaggcctttctccacttag           | 329                                   |
| 3           | 59                                                 | tcgtgtgcattagggttcaa           | ttctccgaggtggaattgag           | 428                                   |
| 4           | 59                                                 | tgcattcctcatgggaattt           | cccagtgctgtagagctgtc           | 300                                   |
| 5           | 60                                                 | agccagccaacaatcagag            | aactgcatgcggtgagattt           | 412                                   |
| 6           | 60                                                 | catgaaaaagctgcaagtgt           | aagtcttctgtcctgggtgg           | 322                                   |
| 7           | 60                                                 | gctttctgacgggagtaaac           | aggagacagagcgggacaag           | 334                                   |
| 8           | 58                                                 | ccatcacccctcaagaggac           | gaggaagatgtgttcctttgg          | 333                                   |
| 9           | 55                                                 | gcctgtggatccctagctatt          | ctgaaacaacaacagggtga           | 331                                   |
| 10          | 55                                                 | gtcacaggttcagttgctgt           | gggaacaggaaatatgtcgaa          | 285                                   |
| 11          | 58                                                 | ccctgagagtctagagtaatgtctcat    | tctctgttaagcctaattcca          | 280                                   |
| 12          | 56                                                 | tcaatcaaaggtggtctgga           | aatgggaatagcccttcaa            | 414                                   |
| 13          | 61                                                 | caaggtcatggagcacagg            | aacaacaacctggagcctta           | 333                                   |
| 14          | 56                                                 | ggtgatttgtgttctctgcaa          | tcactactgttcggcttctg           | 262                                   |
| 15          | 60                                                 | atcatttggctttcccact            | acaaacctcggcaatttgtt           | 407                                   |
| 16          | 56                                                 | caacatccagacacatagtgattt       | gtcagaaatgcaggaaagca           | 300                                   |
| 17          | 60                                                 | gccaaggccatggaatct             | aactgctaattggcccgttct          | 322                                   |
| 18          | 60                                                 | gtgtcttggcaccceaagc            | ccccaccagaccatgaga             | 340                                   |
| 19          | 60                                                 | cagcatgtggcaccatctc            | cagagcagctgccagacat            | 273                                   |
| 20          | 60                                                 | cattcatgcgtcttcacctg           | catatccccatggcaaacctc          | 412                                   |
| 21          | 60                                                 | agccataagtctctgacgtg           | accagaaatgtctggagagc           | 372                                   |
| 22          | 56                                                 | agactgaaatcccctgttgc           | tcagtacaatagatagacagcaatga     | 435                                   |
| 23          | 60                                                 | gaagcaaattgcccagact            | atttctccagggtgcaaag            | 413                                   |
| 24          | 58                                                 | gcaatgccatctttatcatttc         | gctggcatgtgacagaacac           | 281                                   |
| 25          | 59                                                 | agaccctgctcctatagcc            | ccatgtgagttcactagatggtt        | 379                                   |
| 26          | 57                                                 | cctgcattcagggaaaagtgg          | ggaaaaaccacacaggaag            | 284                                   |
| 27          | 56                                                 | caaggagatctcgggtga             | gagatgctggagggagcac            | 329                                   |
| 28          | 62                                                 | atcctgcatgggatgggtg            | gtggcttggctcctgggtat           | 517                                   |
